# Supplementary material for: Treatment with HC-070, a potent inhibitor of TRPC4 and TRPC5, leads to anxiolytic and antidepressant effects in mice
Source: PubMed Central journal article supplement (PMC5791972; doi:10.1371/journal.pone.0191225), 2018-01-31
Supplement: pone.0191225.s009.pdf [file pone.0191225.s009.pdf]

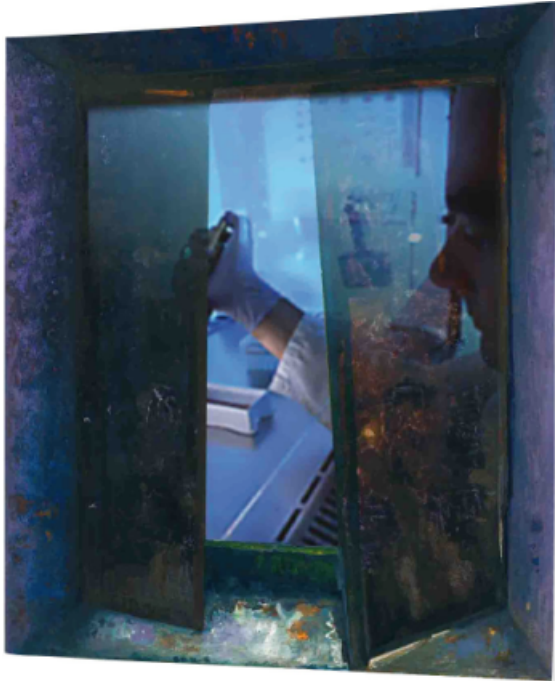

*In Vitro* Pharmacology  
**Study of HC-070**

**STUDY NUMBER**  
**100005024**

Annie OTTO-BRUC, Ph.D.

September 26, 2012

**CONFIDENTIAL**

## STUDY REFERENCES

|                                     |                                                         |                                            |
|-------------------------------------|---------------------------------------------------------|--------------------------------------------|
| <b>Study title</b>                  | <b><i>In Vitro</i> Pharmacology<br/>Study of HC-070</b> |                                            |
| <b>Cerep study number</b>           | <b>100005024</b>                                        | <b>FINAL REPORT<br/>September 26, 2012</b> |
| <b>Experimental period</b>          | September 6, 2012 - September 25, 2012                  |                                            |
| <b>Client personal study number</b> | -                                                       |                                            |
| <b>PO number</b>                    |                                                         |                                            |

## PERSONS INVOLVED IN THE STUDY

|                           |                                                                                                                                                |                                                                                                                                  |
|---------------------------|------------------------------------------------------------------------------------------------------------------------------------------------|----------------------------------------------------------------------------------------------------------------------------------|
| <b>Investigator</b>       | <b>Cerep</b><br>Le Bois l'Evêque<br>B.P. 30001<br>86 600 Celle l'Evescault<br>France<br>Tel: +33 (0)5 49 89 30 00<br>Fax: +33 (0)5 49 43 21 70 | <b>Annie OTTO-BRUC, Ph.D.</b><br>Principal Scientist, Pharmacology<br><br>Tel: +33 (0)5 49 89 33 87<br>Fax: +33 (0)5 49 43 21 70 |
| <b>Study sponsor</b>      | <b>HYDRA BIOSCIENCES</b><br>Target Discovery-Channel group<br>790 Memorial Drive<br><br>CAMBRIDGE, MA 02139<br>U.S.A.                          | <b>Dr. Magdalene MORAN</b><br>Senior Scientist and Director                                                                      |
| <b>Testing facilities</b> | <b>Cerep</b><br>Le Bois l'Evêque<br>B.P. 30001<br>86 600 Celle l'Evescault<br>France                                                           | <b>Cerep</b><br>15318 NE 95th Street<br>Redmond, WA 98052<br>U.S.A.                                                              |

## | APPROVAL

---

**Investigator**

**Cerep**  
Le Bois l'Evêque  
B.P. 30001  
86 600 Celle l'Evescault  
France  
Tel: +33 (0)5 49 89 30 00  
Fax: +33 (0)5 49 43 21 70

**Annie OTTO-BRUC, Ph.D.**  
Principal Scientist, Pharmacology

Tel: +33 (0)5 49 89 33 87  
Fax: +33 (0)5 49 43 21 70

Date *September 27, 2012*

Signature



---

**Quality assurance statement**

Cerep's Quality Unit certifies that results presented in this report were generated using the materials and methods mentioned and that these results accurately reflect the raw data.

Date *September 28, 2012*

Signature

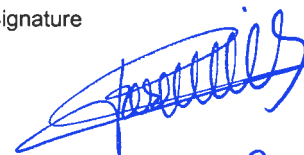

*Nadine Paquier.*

# CONTENTS

|                                                                     |    |
|---------------------------------------------------------------------|----|
| 1. SUMMARY .....                                                    | 5  |
| 2. COMPOUNDS .....                                                  | 6  |
| 2.1. Test Compounds .....                                           | 6  |
| 2.2. Reference Compounds .....                                      | 6  |
| 3. RESULTS .....                                                    | 7  |
| 3.1. <i>In Vitro</i> Pharmacology: Binding Assays .....             | 7  |
| 3.1.1. Test Compound Results .....                                  | 7  |
| 3.1.2. Reference Compound Results .....                             | 10 |
| 3.2. <i>In Vitro</i> Pharmacology: Enzyme and Uptake Assays .....   | 12 |
| 3.2.1. Test Compound Results .....                                  | 12 |
| 3.2.2. Reference Compound Results .....                             | 12 |
| 4. RESULTS INTERPRETATION GUIDE .....                               | 13 |
| 5. STORAGE AND RETENTION OF RECORDS .....                           | 13 |
| 6. MATERIALS AND METHODS .....                                      | 14 |
| 6.1. Experimental Conditions .....                                  | 14 |
| 6.1.1. <i>In Vitro</i> Pharmacology: Binding Assays .....           | 14 |
| 6.1.2. <i>In Vitro</i> Pharmacology: Enzyme and Uptake Assays ..... | 16 |
| 6.2. Analysis and expression of results .....                       | 17 |
| 6.2.1. <i>In Vitro</i> Pharmacology: Binding Assays .....           | 17 |
| 6.2.2. <i>In Vitro</i> Pharmacology: Enzyme and Uptake Assays ..... | 17 |
| 7. BIBLIOGRAPHY .....                                               | 19 |

## **1. SUMMARY**

The purpose of this study was to test HC-070 in binding and enzyme and uptake assays.

## 2. COMPOUNDS

### 2.1. Test Compounds

From: HYDRA BIOSCIENCES

| Client Compound ID | Cerep ID    | Reference Number | Batch Number | FW    | MW    | Purity | Received Form | Stock solution | Flag |
|--------------------|-------------|------------------|--------------|-------|-------|--------|---------------|----------------|------|
| HC-070             | 100005024-1 | -                | 2            | 475.0 | 475.0 | -      | Liquid        | 1.E-02 M DMSO* | -    |

*FW: Formula Weight - MW: Molecular Weight*

\*: For *in vitro* pharmacology assays, depending on the assay volume and solvent tolerance, the stock solutions were diluted to [100x], [333x] or [1000x] in 100% solvent, then either added directly or further diluted to [10x] or [5x] in H<sub>2</sub>O or assay buffer before addition to the assay well (final solvent concentration kept constant).

### 2.2. Reference Compounds

In each experiment and if applicable, the respective reference compound was tested concurrently with HC-070, and the data were compared with historical values determined at Cerep. The experiment was accepted in accordance with Cerep's validation Standard Operating Procedure.

### 3. RESULTS

#### 3.1. *In Vitro* Pharmacology: Binding Assays

##### 3.1.1. Test Compound Results

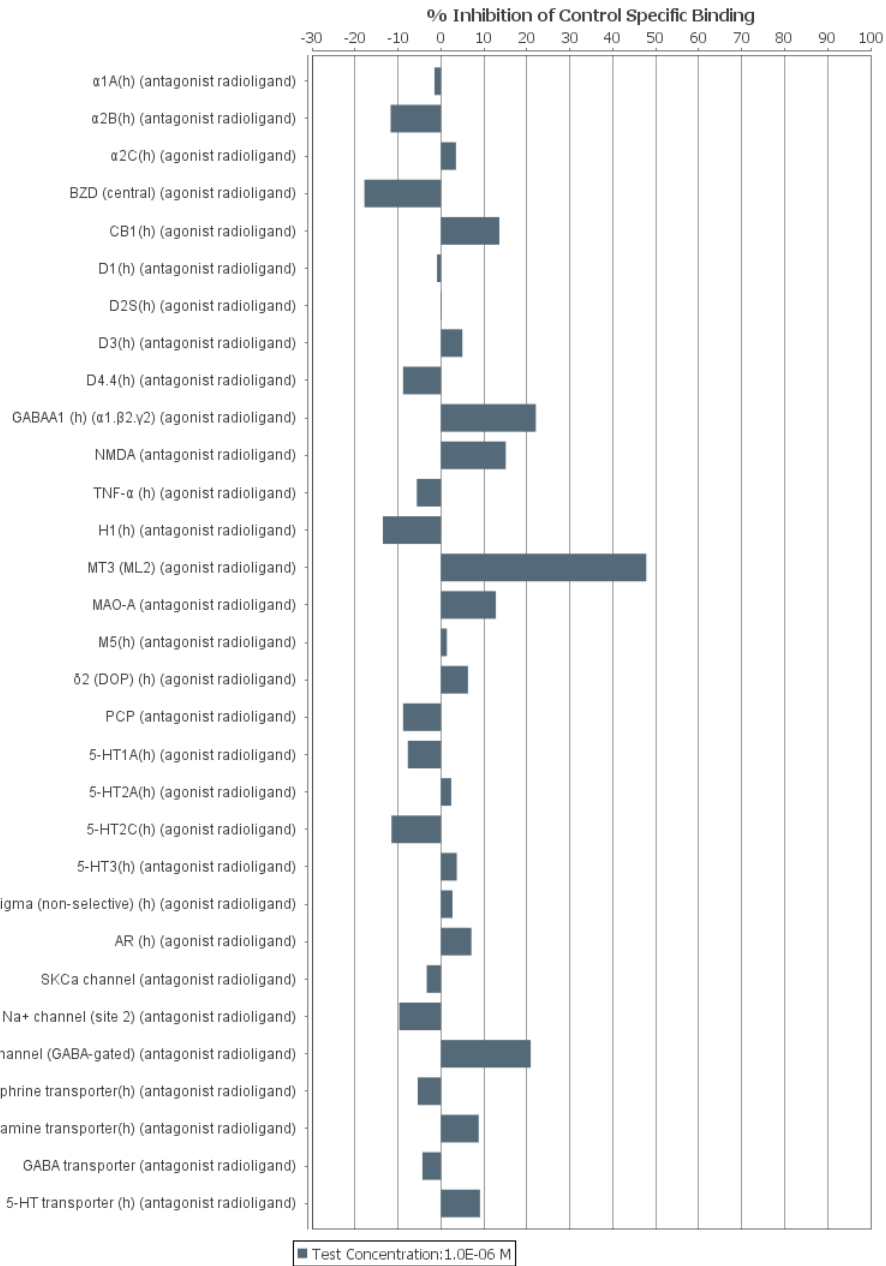

Figure 1. Histogram for HC-070

| Cerep Compound I.D.                                                                           | Client Compound I.D. | Test Concentration | % Inhibition of Control Specific Binding |                 |       |
|-----------------------------------------------------------------------------------------------|----------------------|--------------------|------------------------------------------|-----------------|-------|
|                                                                                               |                      |                    | 1 <sup>st</sup>                          | 2 <sup>nd</sup> | Mean  |
| <b><math>\alpha_{1A}</math> (h) (antagonist radioligand)</b>                                  |                      |                    |                                          |                 |       |
| 100005024-1                                                                                   | HC-070               | 1.0E-06 M          | -6.1                                     | 3.1             | -1.5  |
| <b><math>\alpha_{2B}</math> (h) (antagonist radioligand)</b>                                  |                      |                    |                                          |                 |       |
| 100005024-1                                                                                   | HC-070               | 1.0E-06 M          | -22.3                                    | -1.2            | -11.7 |
| <b><math>\alpha_{2C}</math> (h) (agonist radioligand)</b>                                     |                      |                    |                                          |                 |       |
| 100005024-1                                                                                   | HC-070               | 1.0E-06 M          | 7.9                                      | -1.0            | 3.5   |
| <b>BZD (central) (agonist radioligand)</b>                                                    |                      |                    |                                          |                 |       |
| 100005024-1                                                                                   | HC-070               | 1.0E-06 M          | -26.0                                    | -9.6            | -17.8 |
| <b>CB<sub>1</sub> (h) (agonist radioligand)</b>                                               |                      |                    |                                          |                 |       |
| 100005024-1                                                                                   | HC-070               | 1.0E-06 M          | 8.4                                      | 18.8            | 13.6  |
| <b>D<sub>1</sub> (h) (antagonist radioligand)</b>                                             |                      |                    |                                          |                 |       |
| 100005024-1                                                                                   | HC-070               | 1.0E-06 M          | 3.0                                      | -4.8            | -0.9  |
| <b>D<sub>2S</sub> (h) (agonist radioligand)</b>                                               |                      |                    |                                          |                 |       |
| 100005024-1                                                                                   | HC-070               | 1.0E-06 M          | -3.0                                     | 3.4             | 0.2   |
| <b>D<sub>3</sub> (h) (antagonist radioligand)</b>                                             |                      |                    |                                          |                 |       |
| 100005024-1                                                                                   | HC-070               | 1.0E-06 M          | 3.6                                      | 6.4             | 5.0   |
| <b>D<sub>4.4</sub> (h) (antagonist radioligand)</b>                                           |                      |                    |                                          |                 |       |
| 100005024-1                                                                                   | HC-070               | 1.0E-06 M          | -15.8                                    | -1.8            | -8.8  |
| <b>GABA<sub>A1</sub> (h) (<math>\alpha 1, \beta 2, \gamma 2</math>) (agonist radioligand)</b> |                      |                    |                                          |                 |       |
| 100005024-1                                                                                   | HC-070               | 1.0E-06 M          | 27.9                                     | 16.4            | 22.1  |
| <b>NMDA (antagonist radioligand)</b>                                                          |                      |                    |                                          |                 |       |
| 100005024-1                                                                                   | HC-070               | 1.0E-06 M          | 4.4                                      | 25.7            | 15.1  |
| <b>TNF-<math>\alpha</math> (h) (agonist radioligand)</b>                                      |                      |                    |                                          |                 |       |
| 100005024-1                                                                                   | HC-070               | 1.0E-06 M          | -5.4                                     | -5.8            | -5.6  |
| <b>H<sub>1</sub> (h) (antagonist radioligand)</b>                                             |                      |                    |                                          |                 |       |
| 100005024-1                                                                                   | HC-070               | 1.0E-06 M          | -15.6                                    | -11.4           | -13.5 |
| <b>MT<sub>3</sub> (ML<sub>2</sub>) (agonist radioligand)</b>                                  |                      |                    |                                          |                 |       |
| 100005024-1                                                                                   | HC-070               | 1.0E-06 M          | 46.1                                     | 49.5            | 47.8  |
| <b>MAO-A (antagonist radioligand)</b>                                                         |                      |                    |                                          |                 |       |
| 100005024-1                                                                                   | HC-070               | 1.0E-06 M          | 12.6                                     | 13.1            | 12.8  |
| <b>M<sub>5</sub> (h) (antagonist radioligand)</b>                                             |                      |                    |                                          |                 |       |
| 100005024-1                                                                                   | HC-070               | 1.0E-06 M          | -7.3                                     | 10.1            | 1.4   |
| <b><math>\delta_2</math> (DOP) (h) (agonist radioligand)</b>                                  |                      |                    |                                          |                 |       |
| 100005024-1                                                                                   | HC-070               | 1.0E-06 M          | 6.8                                      | 5.9             | 6.3   |
| <b>PCP (antagonist radioligand)</b>                                                           |                      |                    |                                          |                 |       |
| 100005024-1                                                                                   | HC-070               | 1.0E-06 M          | -7.6                                     | -10.0           | -8.8  |
| <b>5-HT<sub>1A</sub> (h) (agonist radioligand)</b>                                            |                      |                    |                                          |                 |       |
| 100005024-1                                                                                   | HC-070               | 1.0E-06 M          | 8.7                                      | -24.2           | -7.7  |
| <b>5-HT<sub>2A</sub> (h) (agonist radioligand)</b>                                            |                      |                    |                                          |                 |       |
| 100005024-1                                                                                   | HC-070               | 1.0E-06 M          | -1.3                                     | 6.1             | 2.4   |
| <b>5-HT<sub>2C</sub> (h) (agonist radioligand)</b>                                            |                      |                    |                                          |                 |       |
| 100005024-1                                                                                   | HC-070               | 1.0E-06 M          | -13.4                                    | -9.5            | -11.5 |
| <b>5-HT<sub>3</sub> (h) (antagonist radioligand)</b>                                          |                      |                    |                                          |                 |       |
| 100005024-1                                                                                   | HC-070               | 1.0E-06 M          | 4.7                                      | 2.6             | 3.7   |
| <b>sigma (non-selective) (h) (agonist radioligand)</b>                                        |                      |                    |                                          |                 |       |
| 100005024-1                                                                                   | HC-070               | 1.0E-06 M          | 0.3                                      | 5.1             | 2.7   |
| <b>AR (h) (agonist radioligand)</b>                                                           |                      |                    |                                          |                 |       |
| 100005024-1                                                                                   | HC-070               | 1.0E-06 M          | 11.1                                     | 3.2             | 7.1   |
| <b>SK<sub>Ca</sub> channel (antagonist radioligand)</b>                                       |                      |                    |                                          |                 |       |
| 100005024-1                                                                                   | HC-070               | 1.0E-06 M          | -10.1                                    | 3.5             | -3.3  |
| <b>Na<sup>+</sup> channel (site 2) (antagonist radioligand)</b>                               |                      |                    |                                          |                 |       |
| 100005024-1                                                                                   | HC-070               | 1.0E-06 M          | -6.9                                     | -12.5           | -9.7  |



| Cerep Compound I.D.                                                   | Client Compound I.D. | Test Concentration | % Inhibition of Control Specific Binding |                 |      |
|-----------------------------------------------------------------------|----------------------|--------------------|------------------------------------------|-----------------|------|
|                                                                       |                      |                    | 1 <sup>st</sup>                          | 2 <sup>nd</sup> | Mean |
| <b>Cl<sup>-</sup> channel (GABA-gated) (antagonist radioligand)</b>   |                      |                    |                                          |                 |      |
| 100005024-1                                                           | HC-070               | 1.0E-06 M          | 24.2                                     | 17.5            | 20.9 |
| <b>norepinephrine transporter (<i>h</i>) (antagonist radioligand)</b> |                      |                    |                                          |                 |      |
| 100005024-1                                                           | HC-070               | 1.0E-06 M          | -10.1                                    | -0.6            | -5.4 |
| <b>dopamine transporter (<i>h</i>) (antagonist radioligand)</b>       |                      |                    |                                          |                 |      |
| 100005024-1                                                           | HC-070               | 1.0E-06 M          | 8.9                                      | 8.6             | 8.8  |
| <b>GABA transporter (antagonist radioligand)</b>                      |                      |                    |                                          |                 |      |
| 100005024-1                                                           | HC-070               | 1.0E-06 M          | -3.4                                     | -5.2            | -4.3 |
| <b>5-HT transporter (<i>h</i>) (antagonist radioligand)</b>           |                      |                    |                                          |                 |      |
| 100005024-1                                                           | HC-070               | 1.0E-06 M          | -0.3                                     | 18.4            | 9.1  |

### 3.1.2. Reference Compound Results

| Reference Compound                                            | IC <sub>50</sub> (M) | K <sub>i</sub> (M) | nH  |
|---------------------------------------------------------------|----------------------|--------------------|-----|
| <b>α<sub>1A</sub> (h) (antagonist radioligand)</b>            |                      |                    |     |
| WB 4101                                                       | 2.2E-10 M            | 1.1E-10 M          | 1.4 |
| <b>α<sub>2B</sub> (h) (antagonist radioligand)</b>            |                      |                    |     |
| yohimbine                                                     | 5.1E-09 M            | 3.4E-09 M          | 1.0 |
| <b>α<sub>2C</sub> (h) (agonist radioligand)</b>               |                      |                    |     |
| epinephrine                                                   | 4.8E-09 M            | 3.0E-09 M          | 1.1 |
| <b>BZD (central) (agonist radioligand)</b>                    |                      |                    |     |
| diazepam                                                      | 8.4E-09 M            | 7.1E-09 M          | 0.9 |
| <b>CB<sub>1</sub> (h) (agonist radioligand)</b>               |                      |                    |     |
| CP 55940                                                      | 4.0E-10 M            | 3.5E-10 M          | 0.8 |
| <b>D<sub>1</sub> (h) (antagonist radioligand)</b>             |                      |                    |     |
| SCH 23390                                                     | 2.6E-10 M            | 1.0E-10 M          | 1.0 |
| <b>D<sub>2S</sub> (h) (agonist radioligand)</b>               |                      |                    |     |
| 7-OH-DPAT                                                     | 3.5E-09 M            | 1.4E-09 M          | 0.8 |
| <b>D<sub>3</sub> (h) (antagonist radioligand)</b>             |                      |                    |     |
| (+)butaclamol                                                 | 2.9E-09 M            | 6.4E-10 M          | 1.3 |
| <b>D<sub>4.4</sub> (h) (antagonist radioligand)</b>           |                      |                    |     |
| clozapine                                                     | 5.6E-08 M            | 2.2E-08 M          | 1.2 |
| <b>GABA<sub>A1</sub> (h) (α1,β2,γ2) (agonist radioligand)</b> |                      |                    |     |
| muscimol                                                      | 1.0E-07 M            | 6.7E-08 M          | 0.8 |
| <b>NMDA (antagonist radioligand)</b>                          |                      |                    |     |
| CGS 19755                                                     | 1.5E-06 M            | 1.2E-06 M          | 0.8 |
| <b>TNF-α (h) (agonist radioligand)</b>                        |                      |                    |     |
| TNF-alpha                                                     | 1.3E-10 M            | 4.5E-11 M          | 0.9 |
| <b>H<sub>1</sub> (h) (antagonist radioligand)</b>             |                      |                    |     |
| pyrilamine                                                    | 1.6E-09 M            | 9.9E-10 M          | 0.9 |
| <b>MT<sub>3</sub> (ML<sub>2</sub>) (agonist radioligand)</b>  |                      |                    |     |
| melatonin                                                     | 3.8E-08 M            | 3.7E-08 M          | 0.8 |
| <b>MAO-A (antagonist radioligand)</b>                         |                      |                    |     |
| clorgyline                                                    | 1.2E-09 M            | 7.1E-10 M          | 1.6 |
| <b>M<sub>5</sub> (h) (antagonist radioligand)</b>             |                      |                    |     |
| 4-DAMP                                                        | 7.6E-10 M            | 3.8E-10 M          | 0.8 |
| <b>δ<sub>2</sub> (DOP) (h) (agonist radioligand)</b>          |                      |                    |     |
| DPDPE                                                         | 3.7E-09 M            | 2.2E-09 M          | 1.0 |
| <b>PCP (antagonist radioligand)</b>                           |                      |                    |     |
| MK 801                                                        | 7.9E-09 M            | 4.5E-09 M          | 1.0 |
| <b>5-HT<sub>1A</sub> (h) (agonist radioligand)</b>            |                      |                    |     |
| 8-OH-DPAT                                                     | 7.4E-10 M            | 4.6E-10 M          | 0.9 |
| <b>5-HT<sub>2A</sub> (h) (agonist radioligand)</b>            |                      |                    |     |
| (±)DOI                                                        | 2.3E-10 M            | 1.7E-10 M          | 0.8 |
| <b>5-HT<sub>2C</sub> (h) (agonist radioligand)</b>            |                      |                    |     |
| (±)DOI                                                        | 9.8E-10 M            | 8.8E-10 M          | 0.8 |
| <b>5-HT<sub>3</sub> (h) (antagonist radioligand)</b>          |                      |                    |     |
| MDL 72222                                                     | 7.9E-09 M            | 5.5E-09 M          | 1.1 |
| <b>sigma (non-selective) (h) (agonist radioligand)</b>        |                      |                    |     |
| haloperidol                                                   | 3.3E-08 M            | 2.6E-08 M          | 0.6 |
| <b>AR (h) (agonist radioligand)</b>                           |                      |                    |     |
| mibolerone                                                    | 2.8E-09 M            | 1.2E-09 M          | 1.1 |
| <b>SK<sub>Ca</sub> channel (antagonist radioligand)</b>       |                      |                    |     |
| apamin                                                        | 9.9E-12 M            | 5.0E-12 M          | 1.1 |

| Reference Compound                                                  | IC <sub>50</sub> (M) | K <sub>i</sub> (M) | nH  |
|---------------------------------------------------------------------|----------------------|--------------------|-----|
| <b>Na<sup>+</sup> channel (site 2) (antagonist radioligand)</b>     |                      |                    |     |
| veratridine                                                         | 9.4E-06 M            | 8.4E-06 M          | 0.9 |
| <b>Cl<sup>-</sup> channel (GABA-gated) (antagonist radioligand)</b> |                      |                    |     |
| picROTOXININ                                                        | 1.3E-07 M            | 1.1E-07 M          | 0.9 |
| <b>norepinephrine transporter (h) (antagonist radioligand)</b>      |                      |                    |     |
| proTRIPTYLINE                                                       | 3.3E-09 M            | 2.5E-09 M          | 1.3 |
| <b>dopamine transporter (h) (antagonist radioligand)</b>            |                      |                    |     |
| BTCP                                                                | 7.4E-09 M            | 3.9E-09 M          | 1.2 |
| <b>GABA transporter (antagonist radioligand)</b>                    |                      |                    |     |
| nipecotic acid                                                      | 2.0E-06 M            | 2.0E-06 M          | 0.8 |
| <b>5-HT transporter (h) (antagonist radioligand)</b>                |                      |                    |     |
| imipramine                                                          | 1.6E-09 M            | 7.1E-10 M          | 0.9 |

## 3.2. *In Vitro* Pharmacology: Enzyme and Uptake Assays

### 3.2.1. Test Compound Results

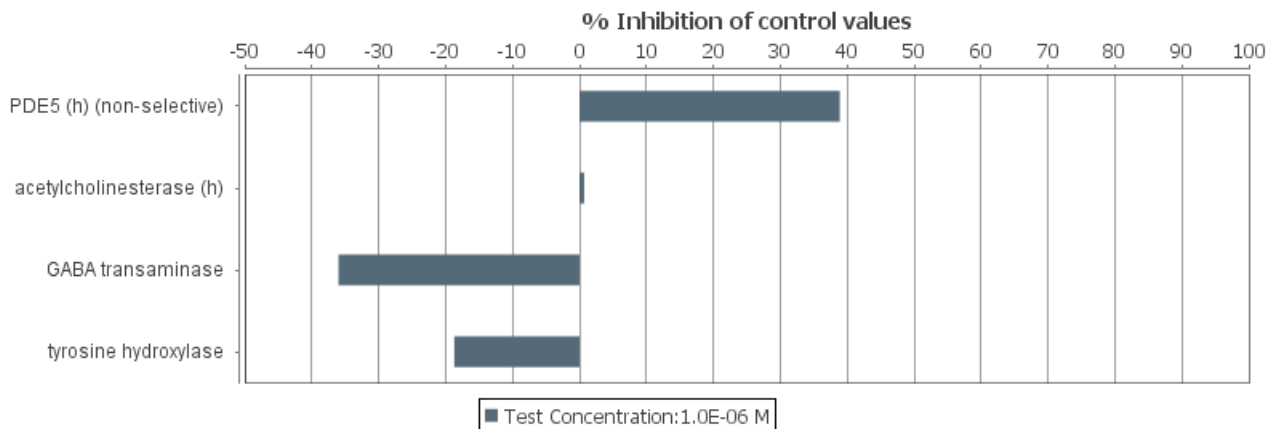

Figure 2. Histogram for HC-123070

| Cerep Compound I.D.             | Client Compound I.D. | Test Concentration | % Inhibition of control values |                 |       |
|---------------------------------|----------------------|--------------------|--------------------------------|-----------------|-------|
|                                 |                      |                    | 1 <sup>st</sup>                | 2 <sup>nd</sup> | Mean  |
| <b>PDE5 (h) (non-selective)</b> |                      |                    |                                |                 |       |
| 100005024-1                     | HC-123               | 1.0E-06 M          | 27.3                           | 50.4            | 38.9  |
| <b>acetylcholinesterase (h)</b> |                      |                    |                                |                 |       |
| 100005024-1                     | HC-070               | 1.0E-06 M          | 2.1                            | -0.7            | 0.7   |
| <b>GABA transaminase</b>        |                      |                    |                                |                 |       |
| 100005024-1                     | HC-070               | 1.0E-06 M          | -33.1                          | -38.8           | -36.0 |
| <b>tyrosine hydroxylase</b>     |                      |                    |                                |                 |       |
| 100005024-1                     | HC-070               | 1.0E-06 M          | -27.2                          | -10.1           | -18.7 |

### 3.2.2. Reference Compound Results

| Reference Compound              | IC <sub>50</sub> (M) | nH  |
|---------------------------------|----------------------|-----|
| <b>PDE5 (h) (non-selective)</b> |                      |     |
| dipyridamole                    | 9.0E-07 M            | 1.7 |
| <b>acetylcholinesterase (h)</b> |                      |     |
| neostigmine                     | 2.7E-08 M            | 1.2 |
| <b>GABA transaminase</b>        |                      |     |
| AoAA                            | 1.3E-07 M            | 1.7 |
| <b>tyrosine hydroxylase</b>     |                      |     |
| 3-iodo L-tyrosine               | 6.1E-07 M            | 1.0 |

## 4. RESULTS INTERPRETATION GUIDE

### *In Vitro* Pharmacology

Results showing an inhibition (or stimulation for assays run in basal conditions) higher than 50% are considered to represent significant effects of the test compounds. 50% is the most common cut-off value for further investigation (determination of  $IC_{50}$  or  $EC_{50}$  values from concentration-response curves) that we would recommend.

Results showing an inhibition (or stimulation) between 25% and 50% are indicative of weak to moderate effects (in most assays, they should be confirmed by further testing as they are within a range where more inter-experimental variability can occur).

Results showing an inhibition (or stimulation) lower than 25% are not considered significant and mostly attributable to variability of the signal around the control level.

Low to moderate negative values have no real meaning and are attributable to variability of the signal around the control level. High negative values ( $\geq 50\%$ ) that are sometimes obtained with high concentrations of test compounds are generally attributable to non-specific effects of the test compounds in the assays. On rare occasion they could suggest an allosteric effect of the test compound.

## 5. STORAGE AND RETENTION OF RECORDS

All documents generated during the performance of the study (raw data, various records such as QA audit reports, an original copy of the study report, study plan...) will be archived by Cerep for a 10-year period after study completion. The access to the archives is restricted to authorized employees only.

The original final report provided to the sponsor will be kept by the sponsor under its sole responsibility.

## 6. MATERIALS AND METHODS

### 6.1. Experimental Conditions

#### 6.1.1. *In Vitro* Pharmacology: Binding Assays

| Assay                                                                                         | Source                            | Ligand                             | Conc.  | Kd       | Non Specific                 | Incubation   | Detection Method       | Bibl. |
|-----------------------------------------------------------------------------------------------|-----------------------------------|------------------------------------|--------|----------|------------------------------|--------------|------------------------|-------|
| <b>Receptors</b>                                                                              |                                   |                                    |        |          |                              |              |                        |       |
| $\alpha_{1A}$ ( <i>h</i> )<br>(antagonist radioligand)                                        | human recombinant (CHO cells)     | [ <sup>3</sup> H]prazosin          | 0.1 nM | 0.1 nM   | epinephrine (0.1 mM)         | 60 min RT    | Scintillation counting | 897   |
| $\alpha_{2B}$ ( <i>h</i> )<br>(antagonist radioligand)                                        | human recombinant (CHO cells)     | [ <sup>3</sup> H]RX 821002         | 2.5 nM | 5 nM     | (-)epinephrine (100 $\mu$ M) | 60 min RT    | Scintillation counting | 56    |
| $\alpha_{2C}$ ( <i>h</i> )<br>(agonist radioligand)                                           | human recombinant (CHO cells)     | [ <sup>3</sup> H] UK 14.304        | 3 nM   | 5 nM     | RX 821002                    | 60 min RT    | Scintillation counting | 1126  |
| CB <sub>1</sub> ( <i>h</i> )<br>(agonist radioligand)                                         | human recombinant (CHO cells)     | [ <sup>3</sup> H]CP 55940          | 0.5 nM | 3.5 nM   | WIN 55212-2 (10 $\mu$ M)     | 120 min 37°C | Scintillation counting | 657   |
| D <sub>1</sub> ( <i>h</i> )<br>(antagonist radioligand)                                       | human recombinant (CHO cells)     | [ <sup>3</sup> H]SCH 23390         | 0.3 nM | 0.2 nM   | SCH 23390 (1 $\mu$ M)        | 60 min RT    | Scintillation counting | 281   |
| D <sub>2S</sub> ( <i>h</i> )<br>(agonist radioligand)                                         | human recombinant (HEK-293 cells) | [ <sup>3</sup> H]7-OH-DPAT         | 1 nM   | 0.68 nM  | butaclamol (10 $\mu$ M)      | 60 min RT    | Scintillation counting | 87    |
| D <sub>3</sub> ( <i>h</i> )<br>(antagonist radioligand)                                       | human recombinant (CHO cells)     | [ <sup>3</sup> H]methyl-spiperone  | 0.3 nM | 0.085 nM | (+)butaclamol (10 $\mu$ M)   | 60 min RT    | Scintillation counting | 145   |
| D <sub>4,4</sub> ( <i>h</i> )<br>(antagonist radioligand)                                     | human recombinant (CHO cells)     | [ <sup>3</sup> H]methyl-spiperone  | 0.3 nM | 0.19 nM  | (+)butaclamol (10 $\mu$ M)   | 60 min RT    | Scintillation counting | 252   |
| GABA <sub>A1</sub> ( <i>h</i> )<br>( $\alpha 1, \beta 2, \gamma 2$ )<br>(agonist radioligand) | human recombinant (CHO cells)     | [ <sup>3</sup> H]muscimol          | 15 nM  | 30 nM    | muscimol (10 $\mu$ M)        | 120 min RT   | Scintillation counting | 1096  |
| TNF- $\alpha$ ( <i>h</i> )<br>(agonist radioligand)                                           | U-937 cells                       | [ <sup>125</sup> I]TNF- $\alpha$   | 0.1 nM | 0.05 nM  | TNF- $\alpha$ (10 nM)        | 120 min 4°C  | Scintillation counting | 26    |
| H <sub>1</sub> ( <i>h</i> )<br>(antagonist radioligand)                                       | human recombinant (HEK-293 cells) | [ <sup>3</sup> H]pyrilamine        | 1 nM   | 1.7 nM   | pyrilamine (1 $\mu$ M)       | 60 min RT    | Scintillation counting | 492   |
| MT <sub>3</sub> (ML <sub>2</sub> )<br>(agonist radioligand)                                   | hamster brain                     | [ <sup>125</sup> I]2-iodomelatonin | 0.1 nM | 4.8 nM   | melatonin (30 $\mu$ M)       | 60 min 4°C   | Scintillation counting | 186   |
| M <sub>5</sub> ( <i>h</i> )<br>(antagonist radioligand)                                       | human recombinant (CHO cells)     | [ <sup>3</sup> H]4-DAMP            | 0.3 nM | 0.3 nM   | atropine (1 $\mu$ M)         | 60 min RT    | Scintillation counting | 59    |
| $\delta_2$ (DOP) ( <i>h</i> )<br>(agonist radioligand)                                        | human recombinant (CHO cells)     | [ <sup>3</sup> H]DADLE             | 0.5 nM | 0.73 nM  | naltrexone (10 $\mu$ M)      | 120 min RT   | Scintillation counting | 501   |
| 5-HT <sub>1A</sub> ( <i>h</i> )<br>(agonist radioligand)                                      | human recombinant (HEK-293 cells) | [ <sup>3</sup> H]8-OH-DPAT         | 0.3 nM | 0.5 nM   | 8-OH-DPAT (10 $\mu$ M)       | 60 min RT    | Scintillation counting | 164   |
| 5-HT <sub>2A</sub> ( <i>h</i> )<br>(agonist radioligand)                                      | human recombinant (HEK-293 cells) | [ <sup>125</sup> I]( $\pm$ )DOI    | 0.1 nM | 0.3 nM   | ( $\pm$ )DOI (1 $\mu$ M)     | 60 min RT    | Scintillation counting | 288   |

| Assay                                                               | Source                            | Ligand                                                         | Conc.    | Kd       | Non Specific         | Incubation   | Detection Method       | Bibl. |
|---------------------------------------------------------------------|-----------------------------------|----------------------------------------------------------------|----------|----------|----------------------|--------------|------------------------|-------|
| <b>5-HT<sub>2C</sub> (h) (agonist radioligand)</b>                  | human recombinant (HEK-293 cells) | [ <sup>125</sup> I](±)DOI                                      | 0.1 nM   | 0.9 nM   | (±)DOI (10 µM)       | 60 min 37°C  | Scintillation counting | 288   |
| <b>sigma (non-selective) (h) (agonist radioligand)</b>              | cellules Jurkat (endogène)        | [ <sup>3</sup> H]DTG                                           | 10 nM    | 41 nM    | Haloperidol (10 µM)  | 120 min RT   | Scintillation counting | 1136  |
| <b>AR (h) (agonist radioligand)</b>                                 | LNCaP cells (cytosol)             | [ <sup>3</sup> H]methyltrienolone                              | 1 nM     | 0.8 nM   | mibolerone (1 µM)    | 24 hr 4°C    | Scintillation counting | 498   |
| <b>Ion channels</b>                                                 |                                   |                                                                |          |          |                      |              |                        |       |
| <b>BZD (central) (agonist radioligand)</b>                          | rat cerebral cortex               | [ <sup>3</sup> H]flunitrazepam                                 | 0.4 nM   | 2.1 nM   | diazepam (3 µM)      | 60 min 4°C   | Scintillation counting | 227   |
| <b>NMDA (antagonist radioligand)</b>                                | rat cerebral cortex               | [ <sup>3</sup> H]CGP 39653                                     | 5 nM     | 23 nM    | L-glutamate (100 µM) | 60 min 4°C   | Scintillation counting | 221   |
| <b>PCP (antagonist radioligand)</b>                                 | rat cerebral cortex               | [ <sup>3</sup> H]TCP                                           | 10 nM    | 13 nM    | MK 801 (10 µM)       | 120 min 37°C | Scintillation counting | 257   |
| <b>5-HT<sub>3</sub> (h) (antagonist radioligand)</b>                | human recombinant (CHO cells)     | [ <sup>3</sup> H]BRL 43694                                     | 0.5 nM   | 1.15 nM  | MDL 72222 (10 µM)    | 120 min RT   | Scintillation counting | 109   |
| <b>SK<sub>Ca</sub> channel (antagonist radioligand)</b>             | rat cerebral cortex               | [ <sup>125</sup> I]apamin                                      | 0.007 nM | 0.007 nM | apamin (100 nM)      | 60 min 4°C   | Scintillation counting | 112   |
| <b>Na<sup>+</sup> channel (site 2) (antagonist radioligand)</b>     | rat cerebral cortex               | [ <sup>3</sup> H]batrachotoxinin                               | 10 nM    | 91 nM    | veratridine (300 µM) | 60 min 37°C  | Scintillation counting | 28    |
| <b>Cl<sup>-</sup> channel (GABA-gated) (antagonist radioligand)</b> | rat cerebral cortex               | [ <sup>35</sup> S]TBPS                                         | 3 nM     | 14.6 nM  | picROTOXININ (20 µM) | 120 min RT   | Scintillation counting | 136   |
| <b>Transporters</b>                                                 |                                   |                                                                |          |          |                      |              |                        |       |
| <b>norepinephrine transporter (h) (antagonist radioligand)</b>      | human recombinant (CHO cells)     | [ <sup>3</sup> H]nisoxetine                                    | 1 nM     | 2.9 nM   | desipramine (1 µM)   | 120 min 4°C  | Scintillation counting | 180   |
| <b>dopamine transporter (h) (antagonist radioligand)</b>            | human recombinant (CHO cells)     | [ <sup>3</sup> H]BTCP                                          | 4 nM     | 4.5 nM   | BTCP (10 µM)         | 120 min 4°C  | Scintillation counting | 190   |
| <b>GABA transporter (antagonist radioligand)</b>                    | rat cerebral cortex               | [ <sup>3</sup> H]GABA (+ 10 µM isoguvacine) (+ 10 µM baclofen) | 10 nM    | 4600 nM  | GABA (1 mM)          | 30 min RT    | Scintillation counting | 214   |
| <b>5-HT transporter (h) (antagonist radioligand)</b>                | human recombinant (CHO cells)     | [ <sup>3</sup> H]imipramine                                    | 2 nM     | 1.7 nM   | imipramine (10 µM)   | 60 min RT    | Scintillation counting | 566   |
| <b>Other enzymes</b>                                                |                                   |                                                                |          |          |                      |              |                        |       |
| <b>MAO-A (antagonist radioligand)</b>                               | rat cerebral cortex               | [ <sup>3</sup> H]Ro 41-1049                                    | 10 nM    | 14 nM    | clorgyline (1 µM)    | 60 min 37°C  | Scintillation counting | 36    |

## 6.1.2. *In Vitro* Pharmacology: Enzyme and Uptake Assays

| Assay                               | Source                                  | Substrate/<br>Stimulus/Tracer              | Incubation     | Measured<br>Component             | Detection Method          | Bibl. |
|-------------------------------------|-----------------------------------------|--------------------------------------------|----------------|-----------------------------------|---------------------------|-------|
| <b>Other enzymes</b>                |                                         |                                            |                |                                   |                           |       |
| <b>PDE5 (h)<br/>(non-selective)</b> | human platelets                         | [ <sup>3</sup> H]cGMP<br>+ cGMP (1 μM)     | 60 min<br>RT   | [ <sup>3</sup> H]5'GMP            | Scintillation<br>counting | 263   |
| <b>acetylcholinesterase (h)</b>     | human<br>recombinant<br>(HEK-293 cells) | AMTCh<br>(400 μM)                          | 30 min<br>RT   | 5 thio 2<br>nitrobenzoic acid     | Photometry                | 63    |
| <b>GABA<br/>transaminase</b>        | rat brain                               | GABA (9 mM)<br>+ α-ketoglutarate<br>(9 mM) | 60 min<br>37°C | succinic<br>semialdehyde          | Fluorimetry               | 286   |
| <b>tyrosine<br/>hydroxylase</b>     | rat striatum                            | [ <sup>3</sup> H]tyrosine<br>(10 μM)       | 40 min<br>37°C | [ <sup>3</sup> H]H <sub>2</sub> O | Scintillation<br>counting | 168   |



## 6.2. Analysis and expression of results

### 6.2.1. *In Vitro* Pharmacology: Binding Assays

The results are expressed as a percent of control specific binding

$$\frac{\text{measured specific binding}}{\text{control specific binding}} * 100$$

and as a percent inhibition of control specific binding

$$100 - \left( \frac{\text{measured specific binding}}{\text{control specific binding}} * 100 \right)$$

obtained in the presence of HC-070.

---

REDACTED

---

### 6.2.2. *In Vitro* Pharmacology: Enzyme and Uptake Assays

The results are expressed as a percent of control specific activity

$$\frac{\text{measured specific activity}}{\text{control specific activity}} * 100$$

and as a percent inhibition of control specific activity

$$100 - \left( \frac{\text{measured specific activity}}{\text{control specific activity}} * 100 \right)$$

obtained in the presence of HC-070.

REDACTED

---

## 7. BIBLIOGRAPHY

26. Brockhaus, M. et al. (1990), *Proc. Natl. Acad. Sci. U.S.A.*, 87 : 3127-3131.
28. Brown, G.B. (1986), *J. Neurosci.*, 6 : 2064-2070.
36. Cesura, A.M. et al. (1990), *Mol. Pharmacol.*, 37 : 358-366.
56. Devedjian, J.C. et al. (1994), *Eur. J. Pharmacol.*, 252 : 43-49.
59. Dorje, F. et al. (1991), *J. Pharmacol. Exp. Ther.*, 256 : 727-733.
63. Ellman, G.L. et al. (1961), *Biochem. Pharmacol.*, 7 : 88-95.
87. Grandy, D.K. et al. (1989), *Proc. Natl. Acad. Sci. U.S.A.*, 86 : 9762-9766.
109. Hope, A.G. et al. (1996), *Brit. J. Pharmacol.*, 118 : 1237-1245.
112. Hugues, M. et al. (1982), *J. Biol. Chem.*, 257 : 2762-2769.
136. Lewin, A.H. et al. (1989), *Mol. Pharmacol.*, 35 : 189-194.
145. Mackenzie, R.G. et al. (1994), *Eur. J. Pharmacol.*, 266 : 79-85.
164. Mulheron, J.G. et al. (1994), *J. Biol. Chem.*, 269 : 12954-12962.
168. Nagatsu, T. et al. (1964), *Anal. Biochem.*, 9 : 122-126.
180. Pacholczyk, T. et al. (1991), *Nature*, 350 : 350-354.
186. Pickering, D.S. and Niles, L.P. (1990), *Eur. J. Pharmacol.*, 175 : 71-77.
190. Pristupa, Z.B. et al. (1994), *Mol. Pharmacol.*, 45 : 125-135.
214. Shank, R.P. et al. (1990), *J. Neurochem.*, 54 : 2007-2015.
221. Sills, M.A. et al. (1991), *Eur. J. Pharmacol.*, 192 : 19-24.
227. Speth, R.C. et al. (1979), *Life Sci.*, 24 : 351-358.
252. Van Tol, H.H.M. et al. (1992), *Nature*, 358 : 149-152.
257. Vignon, J. et al. (1986), *Brain Res.*, 378 : 133-141.
263. Weishaar, R.E. et al. (1986), *Biochem. Pharmacol.*, 35 : 787-800.
281. Zhou, Q.Y. et al. (1990), *Nature*, 347 : 76-80.
286. Loshner, W. (1981), *J. Neurochem.*, 36 : 1521-1527.
288. Bryant, H.U. et al. (1996), *Life Sci.*, 15 : 1259-1268.
492. Smit, M.J. et al. (1996), *Brit. J. Pharmacol.*, 117 : 1071-1080.
498. Zava, D.T. et al. (1979), *Endocrinology*, 104 : 1007-1012.
501. Simonin, F. et al. (1994), *Mol. Pharmacol.*, 46 : 1015-1021.
566. Tatsumi, M. et al. (1999), *Eur. J. Pharmacol.*, 368 : 277-283.
657. Rinaldi-Carmona, M. et al. (1996), *J. Pharmacol. Exp. Ther.*, 278 : 871-878.
897. Schwinn, D.A. et al. (1990), *J. Biol. Chem.*, 265 : 8183-8189.
1096. Wang, X.K. (2001), *Acta. Pharmacol. Sin.*, 22 : 521-523.
1126. Hoeren, M. et al. (2008), *Nauny-Schmiedeberg's Arch Pharmacol.*, 378 : 17-26
1136. GANAPATHY ME. et al. (1999), *JPET*, 289 : 251-260
